# Supplementary material for: Tumour-infiltrating lymphocytes predict for outcome in HPV-positive oropharyngeal cancer
Source: PubMed Central journal article supplement — Br J Cancer. 2013 Oct 29;110(2):489–500. doi: 10.1038/bjc.2013.639 (PMC3899750; doi:10.1038/bjc.2013.639), 2013-10-29
Supplement: bjc2013639x1.pdf [file bjc2013639x1.pdf]

## Supplementary Information

### Tumour-Infiltrating Lymphocytes predict for outcome in HPV-positive Oropharyngeal

#### Cancer

Ward MJ *et al*

#### Contents:

|                  |                                                                                            |         |
|------------------|--------------------------------------------------------------------------------------------|---------|
| <i>Figure S1</i> | Survival of patients with and without archival pathology material available                | Page 2  |
| <i>Figure S2</i> | TIL-Levels                                                                                 | Page 3  |
| <i>Figure S3</i> | Kaplan-Meier survival curves of HPV-positive patients according to smoking history.        | Page 4  |
| <i>Table S1</i>  | Demographics of patients with and without archival pathology material available            | Page 5  |
| <i>Table S2</i>  | Detailed Treatment Breakdown                                                               | Page 6  |
| <i>Table S3</i>  | Demographics of cohorts stratified by HPV-status and TIL-levels                            | Page 7  |
| <i>Table S4</i>  | T-cell subset counts and ratios                                                            | Page 8  |
| <i>Table S5</i>  | Treatment received by HPV-positive high-risk patients                                      | Page 9  |
| <i>Table S6</i>  | Rank-ordered list of genes describing effector CD8+ T-cells in survivors and non-survivors | Page 10 |

**Figure S1.** Kaplan-Meier survival curves of patients with and without archival pathology material available. The latter were excluded from the study. Demographics of the patients are shown in supplementary Table S1

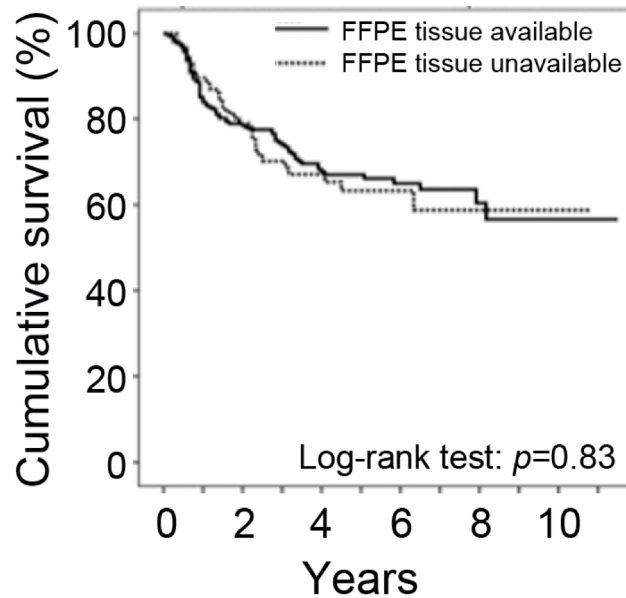

| No. at risk      |     | 0   | 2   | 4  | 6  | 8 | 10 |
|------------------|-----|-----|-----|----|----|---|----|
| FFPE available   | 269 | 175 | 106 | 52 | 19 | 4 |    |
| FFPE unavailable | 132 | 66  | 39  | 18 | 4  | 1 |    |

**Figure S2. TIL-levels**

H+E stained sections showing individual examples of five TIL<sub>high</sub> (A) and five TIL<sub>low</sub> (B) tumors. All x50 magnification.

**A**

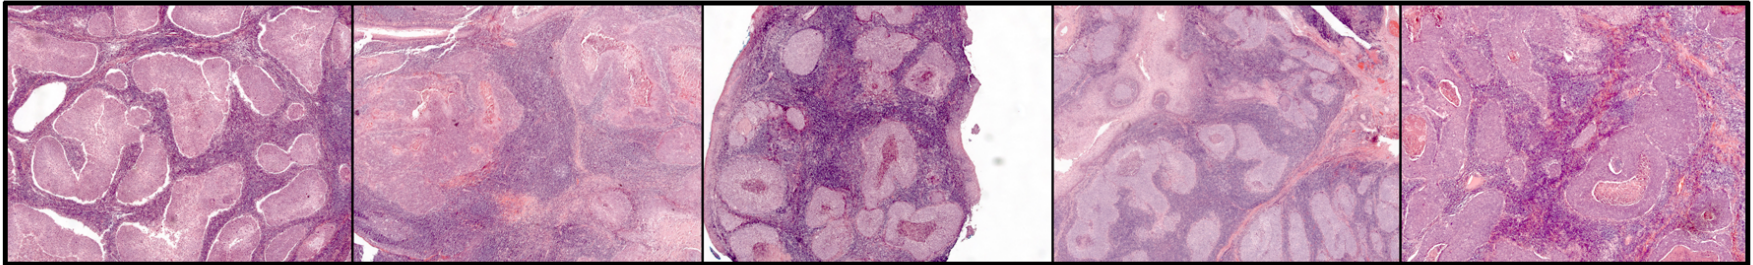

**B**

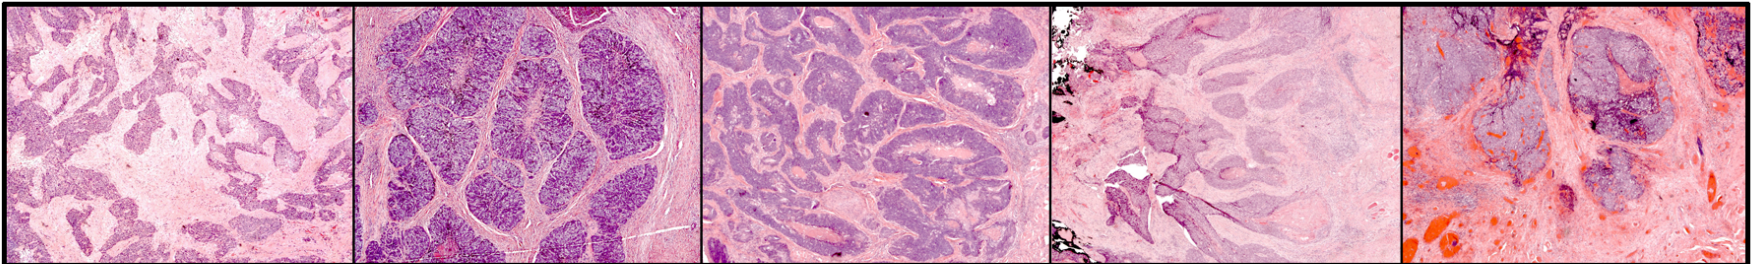

**Figure S3. Kaplan-Meier survival curves of HPV-positive patients according to smoking history.**

Patients who are non-, ex- or current light smokers (<10 pack years) have improved survival compared to those who are current heavy smokers (>10 pack years) in HPV-positive OPSCC (cohorts combined).

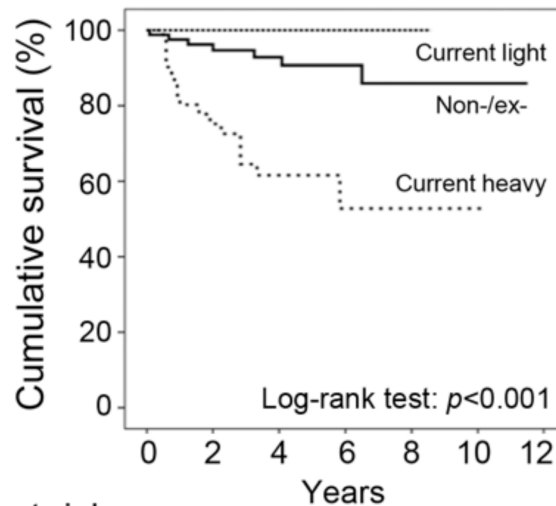

|                      | No. at risk |    |    |    |   |    |
|----------------------|-------------|----|----|----|---|----|
|                      | 0           | 2  | 4  | 6  | 8 | 10 |
| Non-/ex smoker       | 82          | 62 | 43 | 20 | 8 | 1  |
| Current light-smoker | 10          | 8  | 7  | 4  | 1 |    |
| Current heavy-smoker | 41          | 29 | 17 | 6  | 2 | 1  |

**Table S1: Demographics of patients with and without archival pathology samples available**

| Characteristic                                      |                                       | Entire Cohort<br>n=442<br>Number (%) | FFPE Tissue Available<br>n=290<br>Number (%) | FFPE Tissue Unavailable<br>n=152<br>Number (%) |
|-----------------------------------------------------|---------------------------------------|--------------------------------------|----------------------------------------------|------------------------------------------------|
| <b>Gender</b>                                       | <i>Male</i>                           | 325 (73.5)                           | 211 (72.8)                                   | 114 (75)                                       |
|                                                     | <i>Female</i>                         | 117 (26.5)                           | 79 (27.2)                                    | 38 (25)                                        |
| <b>Age</b>                                          | <i>&lt;50</i>                         | 86 (19.5)                            | 58 (20)                                      | 28 (18.4)                                      |
|                                                     | <i>50-69</i>                          | 268 (60.6)                           | 176 (60.7)                                   | 92 (60.5)                                      |
|                                                     | <i>70+</i>                            | 88 (19.9)                            | 56 (19.3)                                    | 32 (21.1)                                      |
|                                                     | <i>Mean (SD)</i>                      | 59.2 (11.3)                          | 59.6 (11.6)                                  | 58.9 (10.7)                                    |
| <b>Smoking</b>                                      | <i>Non Smoker</i>                     | 81 (18.3)                            | 55 (19.0)                                    | 26 (17.1)                                      |
|                                                     | <i>Current Smoker &lt;10/day</i>      | 23 (5.2)                             | 18 (6.2)                                     | 5 (3.3)                                        |
|                                                     | <i>Current Smoker &gt;10/day</i>      | 184 (41.6)                           | 119 (41.0)                                   | 65 (42.8)                                      |
|                                                     | <i>Ex-Smoker</i>                      | 95 (21.5)                            | 60 (20.7)                                    | 35 (23.0)                                      |
|                                                     | <i>Not Known</i>                      | 59 (13.3)                            | 38 (13.1)                                    | 21 (13.8)                                      |
| <b>Alcohol</b>                                      | <i>Non/Ex Drinker</i>                 | 61 (13.8)                            | 37 (12.8)                                    | 24 (15.8)                                      |
|                                                     | <i>Current Drinker</i>                | 271 (61.3)                           | 176 (60.7)                                   | 95 (62.5)                                      |
|                                                     | <i>Not Known</i>                      | 110 (24.9)                           | 77 (26.6)                                    | 33 (21.7)                                      |
| <b>Tumor Site</b>                                   | <i>Tonsil</i>                         | 236 (53.4)                           | 162 (55.9)                                   | 74 (48.7)                                      |
|                                                     | <i>Tongue Base</i>                    | 118 (26.7)                           | 78 (26.9)                                    | 40 (26.3)                                      |
|                                                     | <i>Other Oropharynx</i>               | 88 (19.9)                            | 50 (17.2)                                    | 38 (25)                                        |
| <b>Median Length of Follow Up in Months (Range)</b> |                                       | 49 (2-137)                           | 58 (8-137)                                   | 33 (2-137)                                     |
| <b>Disease Stage</b>                                | <i>I</i>                              | 30 (6.8)                             | 21 (7.2)                                     | 9 (5.9)                                        |
|                                                     | <i>II</i>                             | 42 (9.5)                             | 31 (10.7)                                    | 11 (7.2)                                       |
|                                                     | <i>III</i>                            | 60 (13.6)                            | 37 (12.8)                                    | 23 (15.1)                                      |
|                                                     | <i>IV</i>                             | 306 (69.2)                           | 199 (68.6)                                   | 107 (70.4)                                     |
|                                                     | <i>Not Known</i>                      | 4 (0.9)                              | 2 (0.7)                                      | 2 (1.3)                                        |
| <b>Tumour Stage</b>                                 | <i>T1</i>                             | 109 (24.6)                           | 76 (26.2)                                    | 33 (21.7)                                      |
|                                                     | <i>T2</i>                             | 148 (33.5)                           | 114 (39.3)                                   | 34 (22.4)                                      |
|                                                     | <i>T3</i>                             | 56 (12.7)                            | 29 (10.0)                                    | 27 (17.8)                                      |
|                                                     | <i>T4</i>                             | 120 (27.1)                           | 67 (23.1)                                    | 53 (34.9)                                      |
|                                                     | <i>Tx</i>                             | 4 (0.9)                              | 3 (1.0)                                      | 1 (0.7)                                        |
|                                                     | <i>Not Known</i>                      | 5 (1.1)                              | 1 (0.3)                                      | 4 (2.6)                                        |
| <b>Nodal Stage</b>                                  | <i>N0</i>                             | 103 (23.3)                           | 69 (23.8)                                    | 34 (22.4)                                      |
|                                                     | <i>N1</i>                             | 61 (13.8)                            | 39 (13.4)                                    | 22 (14.5)                                      |
|                                                     | <i>N2</i>                             | 252 (57.0)                           | 166 (57.2)                                   | 86 (56.6)                                      |
|                                                     | <i>N3</i>                             | 22 (5.0)                             | 14 (4.8)                                     | 8 (5.3)                                        |
|                                                     | <i>Not Known</i>                      | 4 (0.9)                              | 2 (0.7)                                      | 2 (1.3)                                        |
| <b>Grade</b>                                        | <i>Well/Moderately Differentiated</i> | 168 (38.0)                           | 110 (37.9)                                   | 58 (38.2)                                      |
|                                                     | <i>Poorly Differentiated</i>          | 250 (56.6)                           | 180 (62.1)                                   | 70 (46.1)                                      |
|                                                     | <i>Not Known</i>                      | 24 (5.4)                             | -                                            | 24 (15.8)                                      |

**Table S2: Detailed Treatment Breakdown**

|                                                                                            | <b>HPV-Positive OPSCC<br/>N=149</b> | <b>HPV-Negative OPSCC<br/>N=121</b> |
|--------------------------------------------------------------------------------------------|-------------------------------------|-------------------------------------|
|                                                                                            | <i>Number (%)</i>                   | <i>Number (%)</i>                   |
| <b><i>Surgery Alone</i></b>                                                                | 5 (3.4)                             | 20 (16.5)                           |
| <b><i>Surgery with Postoperative Radiotherapy</i></b>                                      | 44 (29.5)                           | 32 (26.4)                           |
| <b><i>Surgery with Postoperative Chemoradiotherapy</i></b>                                 | 7 (4.7)                             | 1 (0.8)                             |
| <b><i>Radiotherapy Alone</i></b>                                                           | 24 (16.1)                           | 34 (28.1)                           |
| <b><i>Concurrent Chemoradiotherapy</i></b>                                                 | 31 (20.8)                           | 14 (11.6)                           |
| <b><i>Neoadjuvant Chemotherapy followed by Chemoradiotherapy</i></b>                       | 31 (20.8)                           | 13 (10.7)                           |
| <b><i>Neoadjuvant Chemotherapy followed by Radiotherapy</i></b>                            | 3 (2.0)                             | 5 (4.1)                             |
| <b><i>Neoadjuvant Chemotherapy followed by Surgery with Postoperative Radiotherapy</i></b> | 4 (2.7)                             | 1 (0.8)                             |

**Table S3. Demographics of cohorts stratified by HPV-status and TIL-Levels**

|                         |                                       | UHS Cohort           |                                         |                                         |                                          | PFT/BLT Cohort       |                                        |                                         |                                          |
|-------------------------|---------------------------------------|----------------------|-----------------------------------------|-----------------------------------------|------------------------------------------|----------------------|----------------------------------------|-----------------------------------------|------------------------------------------|
|                         |                                       | HPV-negative<br>n=82 | HPV-positive<br>TIL <sub>low</sub> n=15 | HPV-positive<br>TIL <sub>mod</sub> n=35 | HPV-positive<br>TIL <sub>high</sub> n=51 | HPV-negative<br>n=51 | HPV-positive<br>TIL <sub>low</sub> n=8 | HPV-positive<br>TIL <sub>mod</sub> n=20 | HPV-positive<br>TIL <sub>high</sub> n=22 |
|                         |                                       | Number (%)           | Number (%)                              | Number (%)                              | Number (%)                               | Number (%)           | Number (%)                             | Number (%)                              | Number (%)                               |
| <b>Gender</b>           | <i>Male</i>                           | 56 (68.3)            | 13 (86.7)                               | 26 (74.3)                               | 38 (74.5)                                | 37 (72.5)            | 6 (75.0)                               | 15 (75.0)                               | 15 (68.2)                                |
|                         | <i>Female</i>                         | 26 (31.7)            | 2 (13.3)                                | 9 (25.7)                                | 13 (25.5)                                | 14 (27.5)            | 2 (25.0)                               | 5 (25.0)                                | 7 (31.8)                                 |
| <b>Age at Diagnosis</b> | <i>&lt;50</i>                         | 11 (13.4)            | 6 (40.0)                                | 8 (22.9)                                | 14 (27.5)                                | 7 (13.7)             | 1 (12.5)                               | 5 (25.0)                                | 6 (27.3)                                 |
|                         | <i>50-69</i>                          | 49 (59.8)            | 8 (53.3)                                | 18 (51.4)                               | 33 (64.7)                                | 32 (62.7)            | 6 (75.0)                               | 11 (55.0)                               | 14 (63.6)                                |
|                         | <i>70+</i>                            | 22 (26.8)            | 1 (6.7)                                 | 9 (25.7)                                | 4 (7.8)                                  | 12 (23.5)            | 1 (12.5)                               | 4 (20.0)                                | 2 (9.1)                                  |
|                         | <i>Mean (SD)</i>                      | 61.87 (11.74)        | 54.93 (12.14)                           | 60.09 (13.68)                           | 55.31 (9.25)                             | 59.98 (12.05)        | 56.88 (10.29)                          | 57.30 (12.38)                           | 56.64 (10.22)                            |
| <b>Smoking</b>          | <i>Non-Smoker</i>                     | 7 (8.5)              | 4 (26.7)                                | 9 (25.7)                                | 13 (25.5)                                | 3 (5.9)              | 1 (12.5)                               | 5 (25.0)                                | 12 (54.5)                                |
|                         | <i>Current Smoker &lt;10/day</i>      | 1 (1.2)              | -                                       | 2 (5.7)                                 | 5 (9.8)                                  | 7 (13.7)             | -                                      | 1 (5.0)                                 | 2 (9.1)                                  |
|                         | <i>Current Smoker &gt;10/day</i>      | 50 (61.0)            | 5 (33.3)                                | 9 (25.7)                                | 13 (25.5)                                | 27 (52.9)            | 4 (50.0)                               | 7 (35.0)                                | 2 (9.1)                                  |
|                         | <i>Ex-Smoker</i>                      | 15 (18.3)            | 6 (40.0)                                | 8 (22.9)                                | 14 (27.5)                                | 5 (9.8)              | 3 (37.5)                               | 3 (15.0)                                | 5 (22.7)                                 |
|                         | <i>Not Known</i>                      | 9 (11.0)             | -                                       | 7 (20.0)                                | 6 (11.8)                                 | 9 (17.6)             | -                                      | 4 (20.0)                                | 1 (4.5)                                  |
| <b>Alcohol</b>          | <i>Non/Ex Drinker</i>                 | 12 (14.6)            | 3 (20.0)                                | 4 (11.4)                                | 7 (13.7)                                 | 5 (9.8)              | 1 (12.5)                               | 2 (10.0)                                | 3 (13.6)                                 |
|                         | <i>Current Drinker</i>                | 57 (69.5)            | 8 (53.3)                                | 21 (60.0)                               | 35 (68.6)                                | 22 (43.1)            | 5 (62.5)                               | 11 (55.0)                               | 15 (68.2)                                |
|                         | <i>Not Known</i>                      | 13 (15.9)            | 4 (26.7)                                | 10 (28.6)                               | 9 (17.6)                                 | 24 (47.1)            | 2 (25.0)                               | 7 (35.0)                                | 4 (18.2)                                 |
| <b>Tumour Site</b>      | <i>Tonsil</i>                         | 35 (42.7)            | 12 (80.0)                               | 20 (57.1)                               | 35 (68.6)                                | 24 (47.1)            | 4 (50.0)                               | 11 (55.0)                               | 17 (77.3)                                |
|                         | <i>Tongue Base</i>                    | 24 (29.3)            | 2 (13.3)                                | 12 (34.3)                               | 13 (25.5)                                | 11 (21.6)            | 3 (37.5)                               | 6 (30.0)                                | 5 (22.7)                                 |
|                         | <i>Other Oropharynx</i>               | 23 (28.0)            | 1 (6.7)                                 | 3 (8.6)                                 | 3 (5.9)                                  | 16 (31.4)            | 1 (12.5)                               | 3 (15.0)                                | 0 (0.0)                                  |
| <b>Disease Stage</b>    | <i>I</i>                              | 9 (11.0)             | 0 (0.0)                                 | 0 (0.0)                                 | 1 (2.0)                                  | 9 (17.6)             | 0 (0.0)                                | 1 (5.0)                                 | 1 (4.5)                                  |
|                         | <i>II</i>                             | 12 (14.6)            | 1 (6.7)                                 | 2 (5.7)                                 | 3 (5.9)                                  | 9 (17.6)             | 2 (25.0)                               | 0 (0.0)                                 | 1 (4.5)                                  |
|                         | <i>III</i>                            | 7 (8.5)              | 2 (13.3)                                | 5 (14.3)                                | 3 (5.9)                                  | 10 (19.6)            | 0 (0.0)                                | 4 (20.0)                                | 6 (27.3)                                 |
|                         | <i>IV</i>                             | 54 (65.9)            | 11 (73.3)                               | 28 (80.0)                               | 44 (86.3)                                | 22 (43.1)            | 6 (75.0)                               | 15 (75.0)                               | 14 (63.6)                                |
|                         | <i>Not Known</i>                      | 0 (0.0)              | 0 (0.0)                                 | 0 (0.0)                                 | 0 (0.0)                                  | 1 (2.0)              | 0 (0.0)                                | 0 (0.0)                                 | 0 (0.0)                                  |
| <b>Grade</b>            | <i>Well/Moderately Differentiated</i> | 44 (53.7)            | 3 (20.0)                                | 10 (28.6)                               | 6 (11.8)                                 | 31 (60.8)            | 4 (50.0)                               | 7 (35.0)                                | 3 (13.6)                                 |
|                         | <i>Poorly Differentiated</i>          | 38 (46.3)            | 12 (80.0)                               | 25 (71.4)                               | 45 (88.2)                                | 20 (39.2)            | 4 (50.0)                               | 13 (65.0)                               | 19 (86.4)                                |
| <b>Treatment</b>        | <i>Surgery+/- Radiotherapy</i>        | 31 (37.8)            | 7 (46.7)                                | 13 (37.1)                               | 23 (45.1)                                | 25 (49.1)            | 4 (50.0)                               | 5 (25.0)                                | 7 (31.8)                                 |
|                         | <i>Radiotherapy</i>                   | 25 (30.5)            | 3 (20.0)                                | 8 (22.9)                                | 7 (13.7)                                 | 9 (17.6)             | 1 (12.5)                               | 2 (10.0)                                | 2 (9.1)                                  |
|                         | <i>Chemoradiotherapy</i>              | 20 (24.4)            | 4 (26.7)                                | 13 (37.1)                               | 21 (41.2)                                | 12 (23.5)            | 3 (37.5)                               | 12 (60.0)                               | 12 (54.5)                                |
|                         | <i>None/Palliative</i>                | 6 (7.3)              | 1 (6.7)                                 | 1 (2.9)                                 | 0 (0.0)                                  | 5 (9.8)              | 0 (0.0)                                | 1 (5.0)                                 | 1 (4.5)                                  |
| <b>EGFR</b>             | <i>Negative</i>                       | 26 (31.7)            | 6 (40.0)                                | 14 (40.0)                               | 36 (70.6)                                | 8 (15.7)             | 3 (37.5)                               | 9 (45.0)                                | 10 (45.5)                                |
|                         | <i>Positive</i>                       | 49 (59.8)            | 6 (40.0)                                | 20 (57.1)                               | 10 (19.6)                                | 42 (82.4)            | 5 (62.5)                               | 11 (55.0)                               | 12 (54.5)                                |
|                         | <i>Not Known</i>                      | 7 (8.5)              | 3 (20.0)                                | 1 (2.9)                                 | 5 (9.8)                                  | 1 (2.0)              | 0 (0.0)                                | 0 (0.0)                                 | 0 (0.0)                                  |

**Table S4. T-cell subset counts and ratios**

|                                            | <b>HPV-positive<br/>N=149</b> | <b>HPV-negative<br/>N=121</b> | <b>p-value</b> |
|--------------------------------------------|-------------------------------|-------------------------------|----------------|
| <b><i>Total T-Cell (CD4+CD8)</i></b>       | 111.7                         | 53.7                          | <0.001         |
| <b><i>CD8<sup>+</sup></i></b>              | 57.1                          | 24.0                          | <0.001         |
| <b><i>CD4<sup>+</sup></i></b>              | 54.0                          | 29.9                          | <0.001         |
| <b><i>Foxp3<sup>+</sup></i></b>            | 32.1                          | 16.7                          | <0.001         |
| <b><i>Proportion CD8<sup>+</sup></i></b>   | 51.1%                         | 44.7%                         | <0.001         |
| <b><i>Proportion CD4<sup>+</sup></i></b>   | 48.9%                         | 54.0%                         | <0.001         |
| <b><i>Proportion Foxp3<sup>+</sup></i></b> | 31.2%                         | 36.8%                         | 0.08           |
| <b><i>CD4:CD8 Ratio</i></b>                | 0.96:1                        | 1.21:1                        | <0.001         |
| <b><i>Foxp3:CD8 Ratio</i></b>              | 0.78:1                        | 0.69:1                        | <0.001         |



**Table S5. Treatment received by HPV-positive/TIL<sub>low</sub> patients**

|                                                               | HPV-positive/High-Risk   |
|---------------------------------------------------------------|--------------------------|
|                                                               | Cohorts Combined<br>n=28 |
|                                                               | <i>Number (%)</i>        |
| <i>Surgery with Postoperative Radiotherapy</i>                | 6 (20.7)                 |
| <i>Surgery with Postoperative Chemoradiotherapy</i>           | 4 (13.8)                 |
| <i>Radiotherapy Alone</i>                                     | 8 (27.6)                 |
| <i>Concurrent Chemoradiotherapy</i>                           | 3 (10.3)                 |
| <i>Neoadjuvant Chemotherapy followed by Chemoradiotherapy</i> | 7 (24.1)                 |

**Table S6.** Position of genes describing effector CD8<sup>+</sup> T cells (*Best et al, 2013*) in a rank-ordered list of genes (1-15,031) differentially expressed between HNSCC survivors (survival >3 years, mean 49 months) and non-survivors (survival < 3 years, mean 16 months), (*Thurlow et al, 2010*); with genes enriched in survivors at the top of the list.

| <b>Gene Symbol</b> | <b>Gene Title</b>                                                      | <b>Rank</b> |
|--------------------|------------------------------------------------------------------------|-------------|
| TNFRSF9            | Tumor necrosis factor receptor superfamily, member 9 (4-1BB)           | 126         |
| CCR2               | Chemokine (C-C motif) receptor 2                                       | 177         |
| KLRC3              | Killer cell lectin-like receptor subfamily C, member 3                 | 265         |
| ZDHHC2             | Zinc finger, DHHC-type containing 2                                    | 325         |
| PLEK               | Pleckstrin                                                             | 473         |
| CXCR3              | Chemokine (C-X-C motif) receptor 3                                     | 546         |
| ENTPD1             | Ectonucleoside triphosphate diphosphohydrolase 1                       | 584         |
| CCL4               | Chemokine (C-C motif) ligand 4                                         | 590         |
| KLRG1              | Killer cell lectin-like receptor subfamily G, member 1                 | 915         |
| LIF                | Leukemia inhibitory factor (cholinergic differentiation factor)        | 1028        |
| GZMB               | Granzyme B (granzyme 2, CTL-associated serine esterase 1)              | 1256        |
| IFNG               | Interferon, gamma                                                      | 1288        |
| IRF8               | Interferon regulatory factor 8                                         | 1345        |
| CTLA4              | Cytotoxic T-lymphocyte-associated protein 4                            | 1407        |
| IL18RAP            | Interleukin 18 receptor accessory protein                              | 1411        |
| KLRK1              | Killer cell lectin-like receptor subfamily K, member 1                 | 1424        |
| CX3CR1             | Chemokine (C-X3-C motif) receptor 1                                    | 1490        |
| S100A4             | S100 calcium binding protein A4                                        | 1559        |
| PIK3AP1            | Phosphoinositide-3-kinase adaptor protein 1                            | 1562        |
| CD200              | CD200 molecule                                                         | 1632        |
| ITGA4              | Integrin, alpha 4 (antigen CD49D, alpha 4 subunit of VLA-4 receptor)   | 1677        |
| ID2                | Inhibitor of DNA binding 2, dominant negative helix-loop-helix protein | 1729        |
| ITGAM              | Integrin, alpha M (complement component 3 receptor 3 subunit)          | 1763        |
| GZMA               | Granzyme A (granzyme 1, CTL-associated serine esterase 3)              | 1836        |
| IL3                | Interleukin 3 (colony-stimulating factor, multiple)                    | 1921        |
| IL2                | Interleukin 2                                                          | 2001        |
| MYO1F              | Myosin IF                                                              | 2009        |
| XCL1               | Chemokine (C motif) ligand 1                                           | 2262        |
| GZMK               | Granzyme K (granzyme 3; tryptase II)                                   | 2353        |
| PTPRJ              | Protein tyrosine phosphatase, receptor type, J                         | 2603        |
| IL21               | Interleukin 21                                                         | 2674        |
| DOCK5              | Dedicator of cytokinesis 5                                             | 2710        |
| IRF4               | Interferon regulatory factor 4                                         | 3157        |
| NR4A1              | Nuclear receptor subfamily 4, group A, member 1                        | 3280        |
| ITGAX              | Integrin, alpha X (complement component 3 receptor 4 subunit)          | 3524        |
